# Supplementary material
Source: Springer Nature journal article supplement (https://www.springermedizin.de/resource/supplementary/12874_2012_893_MOESM4_ESM.pdf/9433024)

**A: Cost-effectiveness acceptability curve for 55-year-old patients**

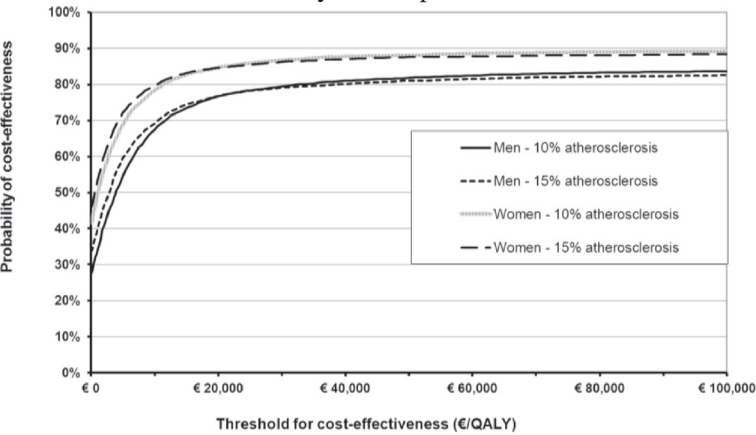

**B: Cost-effectiveness acceptability curve for 65-year-old patients**

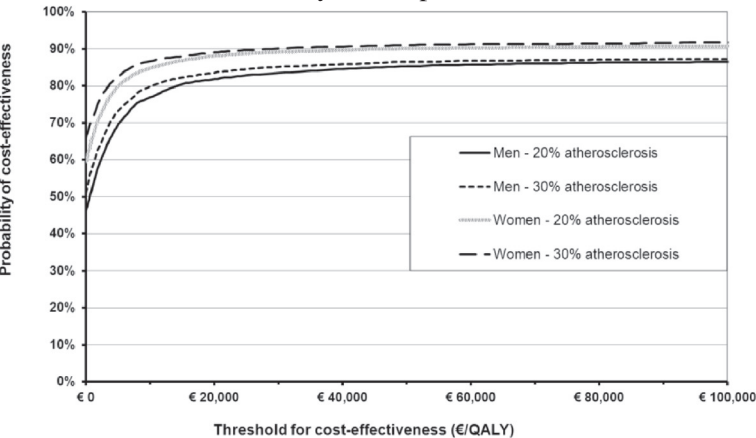

**C: Cost-effectiveness acceptability curve for 75-year-old patients**

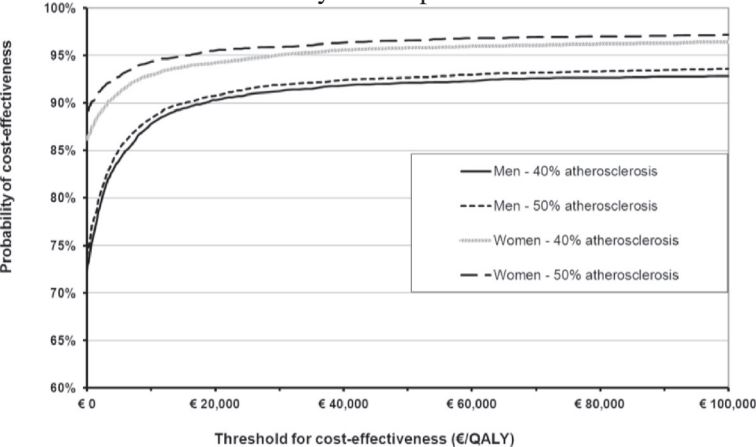

Supplement: MOESM4 [file 9433024]
